# Supplementary material
Source: PubMed Central journal article supplement (PMC6261318)
Supplement: NIHMS1508542-supplement-2.pdf [file NIHMS1508542-supplement-2.pdf]

## SUPPLEMENTAL FIGURES

Including: Figure S1 (relevant to Figure 1); Figure S2 (relevant to Figure 1); Figure S3 (relevant to Figure 3). Figure S4 (relevant to Figure 4). Figure S5 (relevant to Figure 6). Table S1 (relevant to Figures 1-6 and S1-S5). Table S3 (relevant to Figure 6). Table S4 (relevant to Key Resources Table).

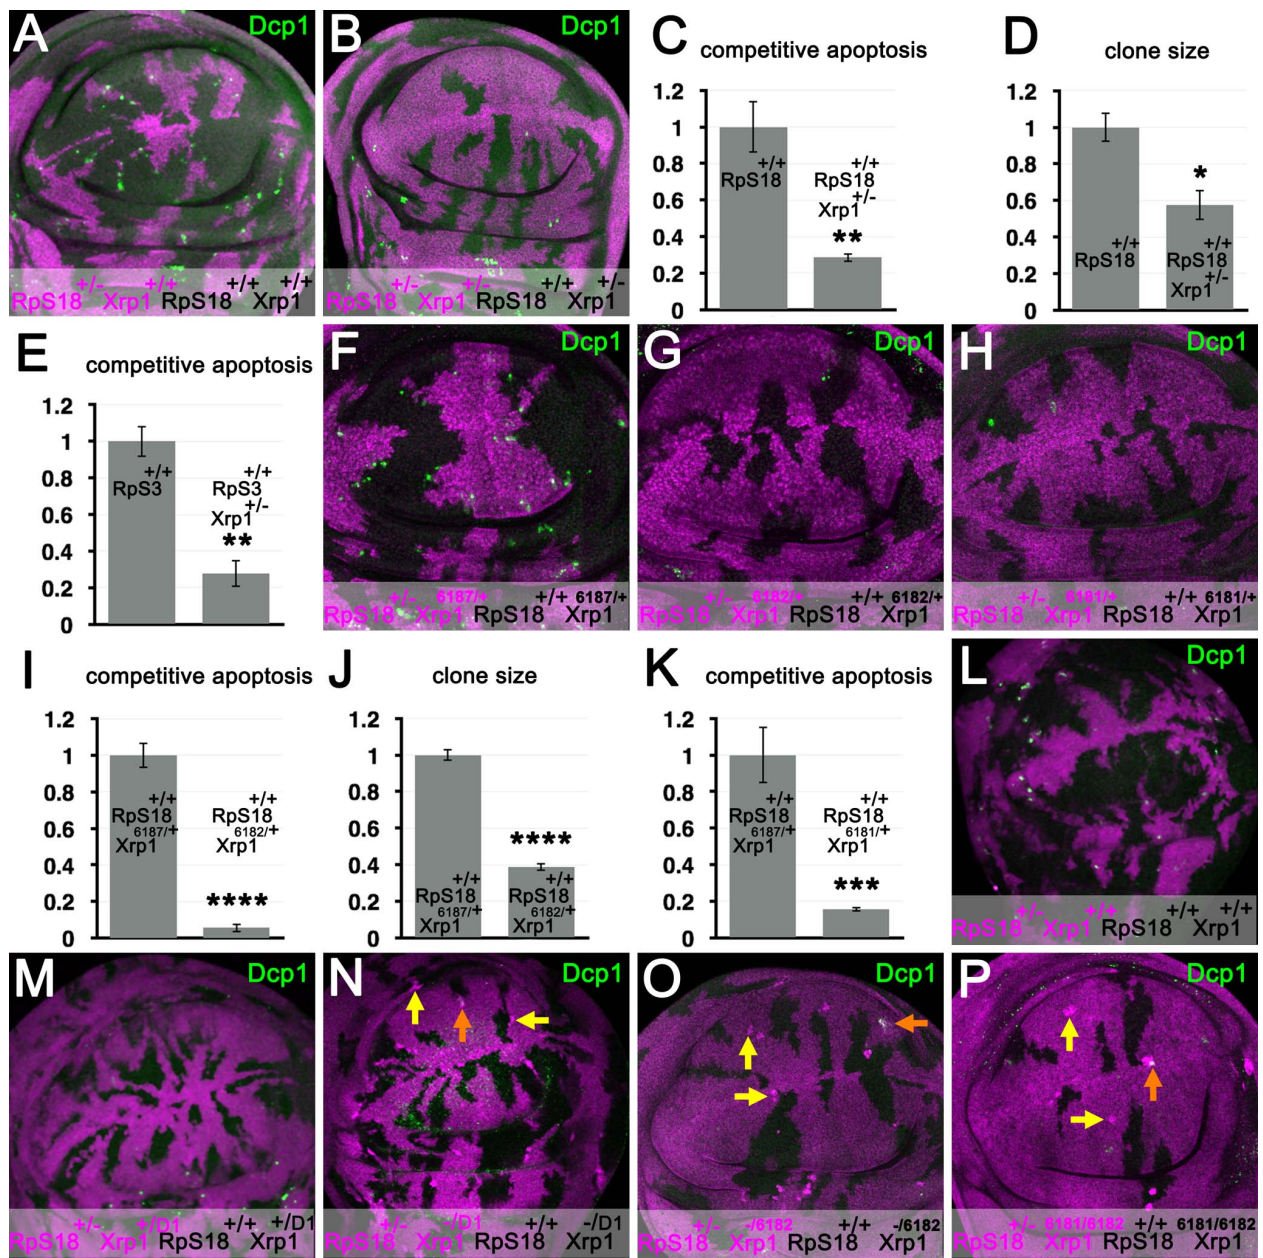

significantly less competitive apoptosis of  $RpS3^{+/-} Xrp1^{m2-73/+}$  cells than  $RpS3^{+/+} Xrp1^{+/+}$  cells induced in  $RpS3^{+/-} Xrp1^{m2-73/+}$ . F). Cell competition in wing imaginal disc heterozygous for  $Df(3R)Exel6187$ , a chromosomal deficiency that does not affect the  $Xrp1$  gene. Dying cells labeled for active Dcp1 (green) are predominantly at the interfaces between  $RpS18^{+/+} Df(3R)Exel6187/+$  cells and  $RpS18^{+/-} Df(3R)Exel6187/+$  cells. G). Mosaic wing imaginal disc heterozygous for  $Df(3R)Exel6182$ , a chromosomal deficiency that deletes part of the  $Xrp1$  gene (see map in Figure 1A). Competitive apoptosis is reduced and the  $RpS18^{+/+} Df(3R)Exel6182/+$  clones occupy less territory compared to  $RpS18^{+/+} Df(3R)Exel6187/+$  clones (compare panel F). H). Mosaic wing imaginal disc heterozygous for  $Df(3R)Exel6181$ , a chromosomal deficiency that deletes part of the  $Xrp1$  gene (see map in Figure 1A). Competitive apoptosis is reduced and the  $RpS18^{+/+} Df(3R)Exel6181/+$  clones occupy less territory compared to  $RpS18^{+/+} Df(3R)Exel6187/+$  clones (compare panel F). I). Quantitative comparison of competitive apoptosis in  $Df(3R)Exel6187/+$  and  $Df(3R)Exel6182/+$  backgrounds. Competitive apoptosis was significantly reduced by heterozygosity for  $Df(3R)Exel6182$ . J). Quantitative comparison of growth in  $Df(3R)Exel6187/+$  and  $Df(3R)Exel6182/+$  backgrounds.  $RpS18^{+/+} Df(3R)6182/+$  cell clones grew to occupy significantly less of  $RpS18^{+/-} Df(3R)6182/+$  wing discs than  $RpS18^{+/+} Df(3R)6187/+$  cells did in  $RpS18^{+/-} Df(3R)6187/+$  wing discs. K). Quantitative comparison of competitive apoptosis in  $Df(3R)Exel6187/+$  and  $Df(3R)Exel6181/+$  backgrounds. Competitive apoptosis was significantly reduced by heterozygosity for  $Df(3R)Exel6181$ . L). Positive control wing imaginal disc, showing the growth and competition of wild type cells (unlabelled) in the  $RpS18^{+/-}$  background (magenta). Dying cells labeled for active Dcp1 (green) are predominantly at the interfaces between wild type and  $RpS18^{+/-}$  cells. M). Mosaic wing imaginal disc heterozygous for  $Xrp1^{D1}$ , a mutation that deletes the  $Xrp1$  gene entirely (see map in Figure 1A). Competitive apoptosis is reduced and the  $RpS18^{+/+} Xrp1^{D1/+}$  clones occupy less territory in  $RpS18^{+/-} Xrp1^{D1/+}$  wing discs than  $RpS18^{+/+} Xrp1^{+/+}$  clones did in  $RpS18^{+/-} Xrp1^{+/+}$  wing discs (compare panel L). N). Mosaic wing imaginal disc homozygous for  $Xrp1$  mutations ( $Xrp1^{m2-73/D1}$ ). Not only did  $RpS18^{+/+} Xrp1^{m2-73/D1}$  clones compete less with  $RpS18^{+/-} Xrp1^{m2-73/D1}$  cells than  $RpS18^{+/+} Xrp1^{+/+}$  clones did with  $RpS18^{+/-} Xrp1^{+/+}$  cells (compare panel L), but small clones of  $RpS18^{+/-} Xrp1^{m2-73/D1}$  clones survived 72h after induction (stronger labeling for  $\beta$ -galactosidase, brighter magenta labeling; examples indicated by yellow arrows). Occasional  $RpS18^{+/-} Xrp1^{m2-73/D1}$  clones contained one or more apoptotic cells positive for active-Dcp1 (green; orange arrow). O). Mosaic wing imaginal disc homozygous for  $Xrp1$  mutations ( $Xrp1^{m2-73}/Df(3R)Exel6182$ ). Not only did  $RpS18^{+/+} Xrp1^{m2-73}/Df(3R)Exel6182$  clones compete less with  $RpS18^{+/-} Xrp1^{m2-73}/Df(3R)Exel6182$  cells than  $RpS18^{+/+} Xrp1^{+/+}$  clones did with  $RpS18^{+/-} Xrp1^{+/+}$  cells (compare panel L), but small clones of  $RpS18^{+/-} Xrp1^{m2-73}/Df(3R)Exel6182$  clones survived 72h after induction (stronger labeling for  $\beta$ -galactosidase, brighter magenta labeling; examples indicated by yellow arrows). Occasional  $RpS18^{+/-} Xrp1^{m2-73}/Df(3R)Exel6182$  clones contained one or more apoptotic cells positive for active-Dcp1 (green; orange arrow). P). Mosaic wing imaginal disc homozygous for  $Xrp1$  mutations ( $Xrp1^{m2-73}/Df(3R)Exel6181$ ). Not only did  $RpS18^{+/+} Xrp1^{m2-73}/Df(3R)Exel6181$  clones compete less with  $RpS18^{+/-} Xrp1^{m2-73}/Df(3R)Exel6181$  cells than  $RpS18^{+/+} Xrp1^{+/+}$  clones did with  $RpS18^{+/-} Xrp1^{+/+}$  cells (compare panel L), but small clones of  $RpS18^{+/-} Xrp1^{m2-73}/Df(3R)Exel6181$  clones survived 72h after induction (stronger labeling for  $\beta$ -galactosidase, brighter magenta labeling; examples indicated by yellow arrows). Occasional  $RpS18^{+/-} Xrp1^{m2-73}/Df(3R)Exel6181$  clones contained one or

more apoptotic cells positive for active-Dcp1 (green; orange arrow). Statistics: competitive apoptosis and wing disc territories occupied by genotypes were compared to the control genotype by t-test. Significance levels:  $p < 0.05$  (\*);  $p < 0.01$  (\*\*);  $p < 0.001$  (\*\*\*) ;  $p < 0.0001$  (\*\*\*\*). Data related to this Figure is shown in Table S1.

|                    |                   |                   |                    |                    |                   |            |  |
|--------------------|-------------------|-------------------|--------------------|--------------------|-------------------|------------|--|
| CCTCTTTCTT         | TTCTGCGCAC        | CACGTTTCCG        | ATTTCGACGTC        |                    |                   |            |  |
| AAA <u>TGAATC</u>  | <u>CGAACCTTCC</u> | <u>GATTTCCAAG</u> | <u>AAACGCAAG</u>   | G                  | TAATTGGGGA        | AAAATGAGAC |  |
| AGGATTACCT         | CCGGCATGTA        | ATGCAGTGTC        | CGTACGTTTCG        | TTGTTTCATC         | GGAGTTGTGT        |            |  |
| GA AAAACCCG        | GCCGAAAAGC        | GCGAAAATCC        | ATCGGCTTCG         | GAGTTAACCT         | CAAAGCAGAT        |            |  |
| GGGCGTCCCA         | AAAAC <u>TTTC</u> | <u>AACTCAACAA</u> | CGCGTGGTGA         | AACAACAACA         | ACAAGAAGGA        |            |  |
| GGATTGCTAG         | GTGTGCAATA        | GATGTGGAAT        | GCGGATTATA         | ATGGTTTCTT         | TTTGCTCCCC        |            |  |
| AG <u>TTTCGTTT</u> | <u>CGATGGCATC</u> | <u>TTCAAGGCTG</u> | <u>AATTGAACGA</u>  | <u>GTTCTGACT</u>   | <u>CGCGAACTCG</u> |            |  |
| <u>CCGAGGATGG</u>  | <u>CTACTCCGGC</u> | <u>GTGGAGGTCC</u> | <u>GTGTGACCCC</u>  | <u>CTCTCGCACT</u>  | <u>GAGATCATCA</u> |            |  |
| <u>TCATGGGCAC</u>  | <u>CAAGACCCAG</u> | <u>CAGGTGCTGG</u> | <u>GCGAGAAGGG</u>  | <u>TGTCGCATT</u>   | <u>CGGGAGCTGA</u> |            |  |
| <u>CCGCCATGGT</u>  | <u>GCAGAAGCGT</u> | <u>TTCAACTTCG</u> | <u>AGACCGGACG</u>  | <u>CATTGAGTTG</u>  | <u>TACGCCGAGA</u> |            |  |
| <u>AGGTGGCCGC</u>  | <u>TCGTGGCCTG</u> | <u>TGCGCCATTG</u> | <u>CCCAGGCTGA</u>  | <u>GTGGCTGAGG</u>  | <u>TACAAGCTCA</u> |            |  |
| <u>CCGGAGGACT</u>  | <u>GGCCGTCCGT</u> | <u>CGTGCTTGCT</u> | <u>ATGGTGTGCT</u>  | <u>CCGCTACATC</u>  | <u>ATGGAGTCGG</u> |            |  |
| <u>GAGCCAAGGG</u>  | <u>CTGCGAGGTC</u> | <u>GTGCTGTCCG</u> | <u>GCAAACCTGG</u>  | <u>TGGTCAGCGT</u>  | <u>GCCAAGTCGA</u> |            |  |
| <u>TGAAATTCGT</u>  | <u>CGATGGCCTG</u> | <u>ATGATCCATT</u> | <u>CGGGAGATCC</u>  | <u>GTGCAACGAC</u>  | <u>TATGTCGAGA</u> |            |  |
| <u>CCGCCACC</u>    | <u>TCATGTGCTC</u> | <u>CTCCGCCAGG</u> | <u>GAGTGCTTGG</u>  | <u>TATCAAGGTC</u>  | <u>AAGGTCATGT</u> |            |  |
| <u>TGCCCTACGA</u>  | <u>CCCCAAGAAC</u> | <u>AAGATCGGCC</u> | <u>CCAAGAAGCC</u>  | <u>GCTGCCCGAC</u>  | <u>AATGTGTCCG</u> |            |  |
| <u>TTTGTGGACC</u>  | <u>CAAGGAGGAG</u> | <u>AAGATCTACG</u> | <u>AACGCCCCGA</u>  | <u>GACCCGAGTAC</u> | <u>AAGATCCCCC</u> |            |  |
| <u>CGCCAGCAA</u>   | <u>GCCACTGGAC</u> | <u>GATCTGTCCG</u> | <u>AGGCGAAAAGT</u> | <u>TTGTAAACC</u>   | <u>TAGTTTACT</u>  |            |  |
| GTTTCATCCAA        | TGAGCGACTA        | GCTGAAAAGAG       | TTGCCCTCAA         | ATACAACAAA         | ACAACAGAAA        |            |  |
| CAAAACAAAA         | ACACATAATA        | ATTCAATAAA        | CAAAATCAAT         | AAGTAATAAC         | CCACTTGTGC        |            |  |
| AGTGCAGTGT         | AGAGTGGCAG        | GGTCAAACAT        | AAAGTTGTGT         | CTGTCCGATA         | TGCAAACCTG        |            |  |
| TTTTCCAAAA         | GGAAAGGATA        | GCTTTTGAAA        | CTCAGGCTAA         | AAATAGACTT         | AGTCCCTCAC        |            |  |
| CACCTCGCCA         | CTATGATTAA        | TAAATATGAA        | ACAGTTTGGC         | CACAAGAGTT         | GCTTACCTTC        |            |  |
| CCATTTTATC         | AGAATAGGAA        | TGCTTAATTT        | GAACAG             |                    |                   |            |  |

Figure S2 (relevant to Figure 1)

Genomic DNA sequence from the *RpS3* transcription unit. Open reading frame in green, interrupted by intron 1.. Sequence alterations from the reference sequences are indicated in red and underlined.

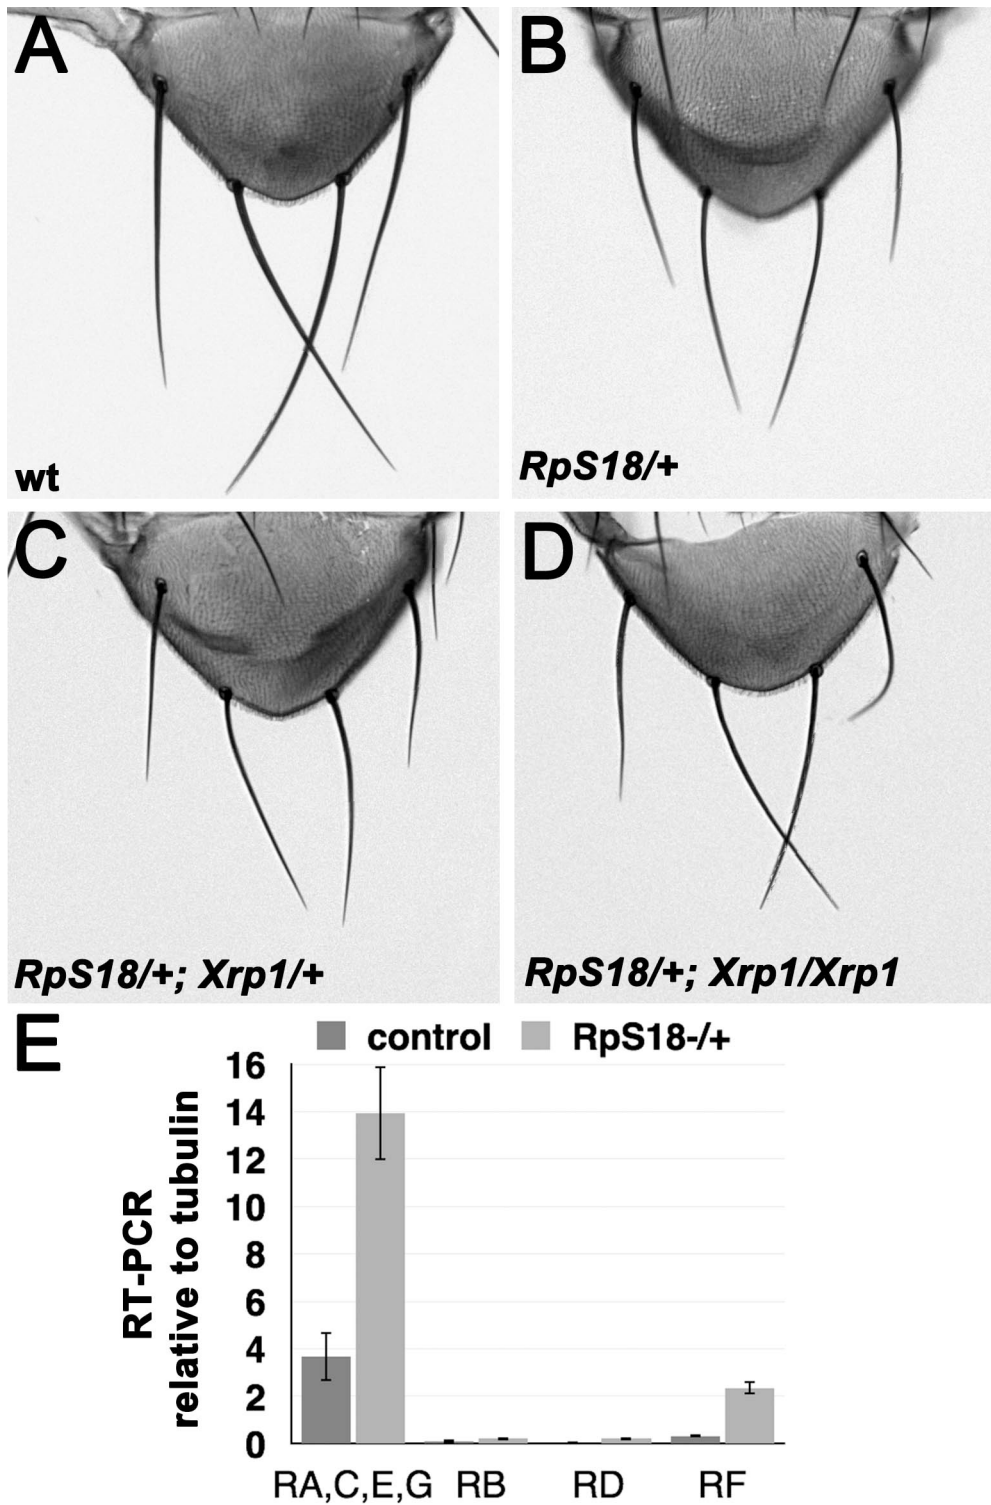

Figure S3. Related to Figure 3

A-D) Scutella from indicated genotypes. Images from main Figure 3A-B are repeated in panels A-B for comparison. E) mRNA levels presented relative to tubulin mRNA. The major *Xrp1* isoforms in wing imaginal discs include RA,C,E,G and RF, but RB and RD are expressed at low levels. Data related to this Figure is shown in Table S1.

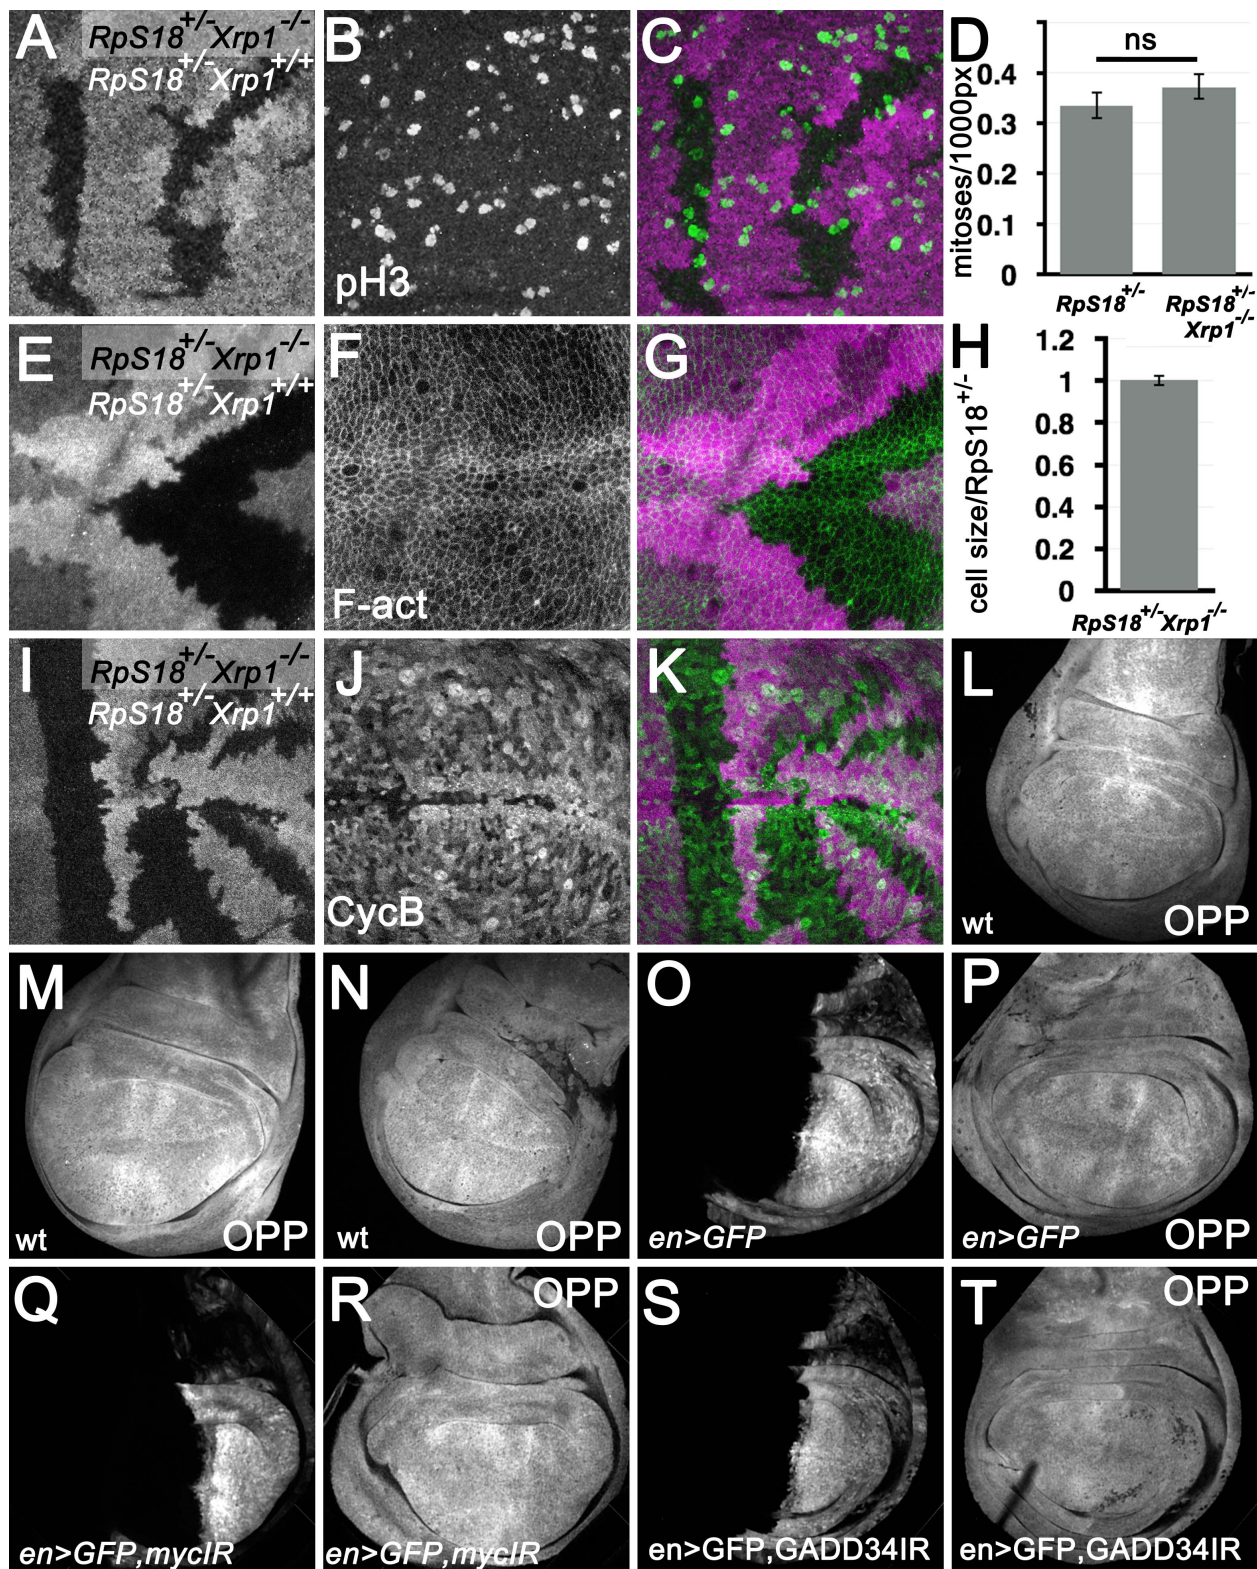

Figure S4. Related to Figure 4

A,E,I) Reciprocal clones of *Xrp1<sup>-/-</sup>* and *Xrp1<sup>+/+</sup>* cells (respectively unlabeled and brightly labeled by beta-galactosidase) in an *RpS18<sup>+/-</sup>* wing disc, similar to the experiment shown in Figure 3H. B) Mitotic cells labeled for phospho-Histone H3. C) Merge of panels A,B. D) Mitotic figures are slightly more frequent in *RpS18<sup>+/-</sup>Xrp1<sup>-/-</sup>* clones than *RpS18<sup>+/-</sup>Xrp1<sup>+/+</sup>* clones, but not significantly so ( $p=0.3583$ , paired t-test). Error bars

represent  $\pm 1$  S.E.M. 612 mitotic cells were counted in 51 clones and 41 twins from 20 mosaic wing discs. F) Phalloiding labeling of F-actin labeling outlines cells in the wing disc shown in panel E). G) Merge of panels E,F. G) Cells in *RpS18<sup>+/-</sup> Xrp1<sup>-/-</sup>* clones do not differ significant in size from cells in *RpS18<sup>+/-</sup> Xrp1<sup>+/+</sup>* clones. (geometric mean  $\pm 1$  S.E.M. of the log-transformed data). 4327 cells were measured in 17 clones and twin clones from 10 mosaic wing discs. J. Cyclin B protein identifies cells in S, G2, and early M-phase but is absent from G1-phase. K. Merge of panels I,J. No difference between G1-phase cells is apparent in the *RpS18<sup>+/-</sup> Xrp1<sup>-/-</sup>* and *RpS18<sup>+/-</sup> Xrp1<sup>+/+</sup>* genotypes. L,M,N) Further examples of OPP labeling of nascent proteins in wild type wing discs. O-P) GFP (O) and OPP (P) labeling of en-Gal4 UAS-GFP wing disc. GFP expression in the posterior compartment does not affect translation rate. Q-R) GFP (Q) and OPP (R) labeling of en-Gal4 UAS-GFP UAS-*mycIR* wing disc. Note that *myc* knock down reduces posterior compartment size as well as translation rate. S-T). GFP (S) and OPP (T) labeling of en-Gal4 UAS-GFP UAS-*Gadd34IR* wing disc. *Gadd34* knock down reduces translation rate in the posterior compartment. Data related to this Figure is shown in Table S1.



# A

## oxidation-reduction process

| gene          | AOX1 | CG3902 | CG10638 | CG18547 | Cyp6a14 | Cyp6a20 | Cyp6d2 | Cyp6d4 | Cyp6g2 | Cyp6t3 | Cyp9f2 | Impl3 | Men | Nox | Sodh-2 |
|---------------|------|--------|---------|---------|---------|---------|--------|--------|--------|--------|--------|-------|-----|-----|--------|
| RpS17/+       | 35.3 | 0.6    | 2.4     | 5.5     | 2.8     | 4.2     | 49.5   | 2.0    | 0.0    | 0.1    | 1.8    | 1.7   | 1.5 | 0.6 | 5.5    |
| RpS3/+        | 47.4 | 0.7    | 2.3     | 5.6     | 2.2     | 5.0     | 21.5   | 1.5    | 0.0    | 0.0    | 1.6    | 2.6   | 1.7 | 0.7 | 4.5    |
| RpS3/+ Xrp1/+ | 1.1  | 0.8    | 1.0     | 1.1     | 0.9     | 1.2     | 1.0    | 0.7    | 0.0    | 0.0    | 1.0    | 1.0   | 0.7 | 0.9 | 0.6    |

DNA repair, DSB repair,  
cellular response to  $\gamma$ -rays,  
DNA biosynthetic process

| gene          | CG5181 | CG6171 | Hus1-like | Ilp8 |
|---------------|--------|--------|-----------|------|
| RpS17/+       | 1.7    | 1.6    | 2.0       | 22.1 |
| RpS3/+        | 1.7    | 1.7    | 1.6       | 13.8 |
| RpS3/+ Xrp1/+ | 2.0    | 1.0    | 1.1       | 1.1  |

## immune response

| gene          | Dif | eater | Spz | Swim | Upd3 |
|---------------|-----|-------|-----|------|------|
| RpS17/+       | 3.5 | 2.7   | 3.2 | 1.9  | 3.0  |
| RpS3/+        | 4.0 | 2.0   | 2.1 | 2.0  | 2.4  |
| RpS3/+ Xrp1/+ | 0.9 | 2.3   | 1.7 | 1.3  | 0.7  |

# B

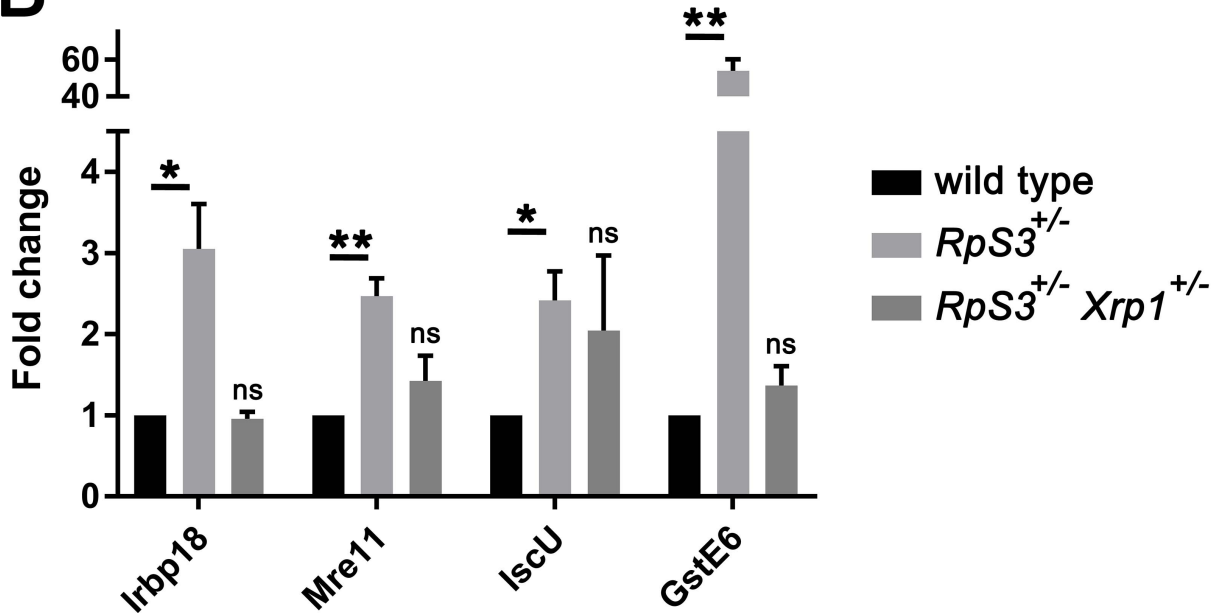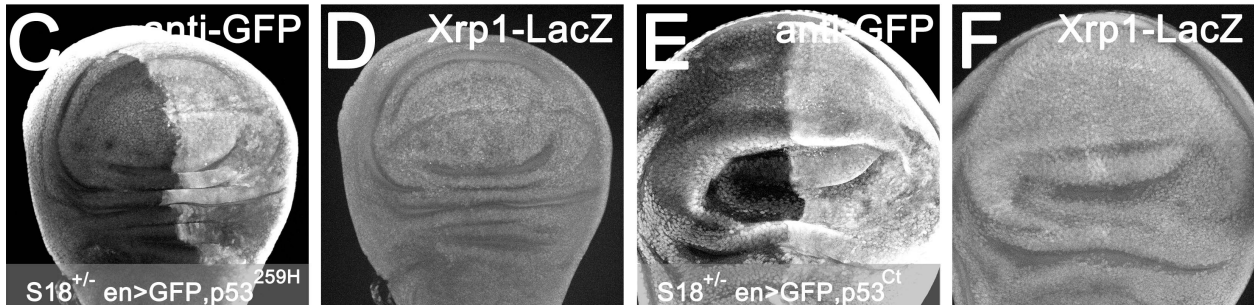

Figure S5. Related to Figure 6

A) Expression levels (fold changes relative to wild type control determined by Deseq2) are shown for Rp-regulated genes with the biological process GO term oxidation-reduction process, which is not statistically enriched among the 253 genes; additional Rp-regulated genes with the GO terms DNA repair, double-strand break repair, cellular response to gamma rays, cellular response to X-rays, DNA biosynthetic process, and with the GO terms immune response or stress-activated MAPK cascade (ie Jnk signaling). Note also upregulation of *upd3*, a potential activator of the Jak-Stat pathway. None of these GO terms were statistically enriched among the 253 genes by our criteria. We also re-analyzed a set of 443 differentially-expressed genes identified by Kucinski et al (2017). We found these genes were enriched ( $p < 0.05$ , Benjamini corrected) for the biological process GO terms oxidation-reduction process ( $p = 0.02$ ), glutathione metabolic process ( $p = 0.009$ ), and sensory perception of sweet taste

( $p=0.012$ ), but not for cellular stress response (no  $p$  value reported by DAVID). B) qRT-PCR validation of representative *Xrp1*-dependent, Rp-dependent transcripts. Fold change is shown in comparison to the wild type control. All the transcripts are more abundant in *RpS3*<sup>+/-</sup> wing discs (\* represents  $p<0.05$ , \*\* represents  $p<0.01$ ; two-tailed t-tests). None of the transcript levels differed between wild type and *RpS3*<sup>+/-</sup> *Xrp1*<sup>+/-</sup> wing discs (significantly (ie  $p>0.05$ )). C) *RpS18*<sup>+/-</sup> wing imaginal disc in which UAS-GFP and UAS-p53<sup>259H</sup> were expressed in posterior cells under control of en-Gal4 and visualized with anti-GFP labeling. D) Expression of the *Xrp1* enhancer trap (*Xrp1*<sup>02515</sup>) was unaffected by inhibiting p53 function. E) *RpS18*<sup>+/-</sup> wing imaginal disc in which UAS-GFP and UAS-p53<sup>Ct</sup> were expressed under control of en-Gal4. F) Expression of the *Xrp1* enhancer trap (*Xrp1*<sup>02515</sup>) was unaffected by inhibiting p53 function. Data related to this Figure is shown in Tables S1-3.

## SUPPLEMENTAL TABLES

Table S1. *Drosophila* Genotypes shown in Figures.  
Relevant to Figures 1-6 and S1-S5.

Fig 1B, H, I : p{hs:FLP}; FRT82B p{arm:LacZ} RpS3/FRT82B  
Fig 1C, J, K: p{hs:FLP}; FRT82B p{arm:LacZ} RpS3/FRT82B Xrp1<sup>M2-73</sup>  
Fig 1F: w Df(1)su(s)R194<sup>-</sup>/p{ey:FLP}; FRT82B p{RpL36<sup>+</sup>} p{arm:LacZ} /FRT82  
Fig 1G: w Df(1)su(s)R194<sup>-</sup>/p{ey:FLP}; FRT82B p{RpL36<sup>+</sup>} p{arm:LacZ} /FRT82 Xrp1<sup>M2-73</sup>  
Fig 1L-M, P: p{hs:FLP}; FRT42 RpS18 p{ubi:GFP} /FRT42  
Fig 1N-O, Q: p{hs:FLP}; FRT42 RpS18 p{ubi:GFP} /FRT42; FRT82B Xrp1<sup>M2-73</sup>/+  
Fig 1R: p{hs:FLP}; FRT82B RpS3/FRT82B p{arm:LacZ}  
Fig 1S: p{hs:FLP}; FRT82B RpS3 Xrp1<sup>M2-73</sup> /FRT82B p{arm:LacZ}  
Fig 1T,U: p{hs:FLP}; FRT82B Xrp1<sup>M2-73</sup> RpS3 /FRT82B p{arm:LacZ}

Fig2A,C: w<sup>11-18</sup>  
Fig2B,D:Df(3R)Exel6181/Df(3R)Exel6182

Fig 3A: p{hs:FLP}; FRT82B p{arm:LacZ}/FRT82B Xrp1<sup>M2-73</sup>  
Fig 3B: p{hs:FLP}; FRT42 RpS18<sup>-</sup> p{ubi:GFP} /+;FRT82B p{arm:LacZ}/FRT82B Xrp1<sup>M2-73</sup>  
Fig 3D: FRT82B p{arm:LacZ} RpS3/FRT82  
FRT82B p{arm:LacZ} RpS3/FRT82 Xrp1<sup>M2-73</sup>  
FRT82 Xrp1<sup>M2-73</sup>/TM6B  
FRT82/TM6B  
Fig 3E: FRT42D RpS18 p{ubi:GFP}/+; FRT82B/+  
FRT42D RpS18 p{ubi:GFP}/+; FRT82B Xrp1<sup>M2-73</sup>/+  
FRT42D RpS18 p{ubi:GFP}/+; FRT82B Xrp1<sup>M2-73</sup>/Df(3R)Exel6181  
FRT42D  
Fig 3F: w<sup>11-18</sup>/FM7  
w<sup>11-18</sup>/FM7; Df(3R)Exel6182/+  
w<sup>11-18</sup>/w Df(1)su(s)R194  
w<sup>11-18</sup>/w Df(1)su(s)R194; Df(3R)Exel6182/+  
Fig 3G: w<sup>11-18</sup>  
Fig 3H: FRT82B p{arm:LacZ} RpS3/w<sup>11-18</sup>  
Fig 3J: FRT42D RpS18 p{ubi:GFP}/CyO  
Fig3K-L: p{hs:FLP}; FRT42 RpS18<sup>-</sup> p{ubi:GFP} /FRT42; FRT82B Xrp1<sup>02515</sup>/+  
Fig3K-L: p{hs:FLP}; FRT42 RpS18<sup>-</sup> p{ubi:GFP} /FRT42  
Fig 3M,N: FRT42 RpS18<sup>-</sup> p{ubi:GFP}/FRT42  
Fig3O: GMR-Gal4/+  
Fig 3P: GMR-Gal4/+; UAS-Xrp1(Flag-CDS2)

Fig4A-B, E: yw; p{arm:LacZ} FRT80B  
Fig4C-D: p{hs:FLP}; p{ubi:GFP} FRT40 /Tor<sup>DP</sup> FRT40  
Fig4F-J: p{hs:FLP}; FRT42 RpS18<sup>-</sup> p{ubi:GFP} /FRT42  
Fig4K-L, O-P: p{hs:FLP}; M(3)67c p{ubi:GFP} FRT80B/FRT80B  
Fig4M-N: p{hs:FLP}; RpL27A<sup>-</sup> p{arm:LacZ} FRT40/FRT40

Fig4Q-T: p{hs:FLP}; FRT42 RpS18<sup>-</sup> p{ubi:GFP} /FRT42; FRT82B Xrp1<sup>M2-73/+</sup>

Fig 5:

Wild type genotype: p{hs:FLP}/w<sup>118</sup>; p{arm:LacZ} FRT80B/+

Xrp1/+ genotype: p{hs:FLP}/w<sup>118</sup>; FRT82B Xrp1<sup>M2-73/+</sup>

RpL27A/+ genotype: p{hs:FLP}/ p{hs:FLP}; RpL27A<sup>-</sup> p{arm:LacZ} FRT40/+; FRT80B/+

RpL27A/+; Xrp/+ genotype: p{hs:FLP}/ p{hs:FLP}; RpL27A<sup>-</sup> p{arm:LacZ} FRT40/+; FRT82B Xrp1<sup>M2-73/+</sup>

RpS18/+ genotype: p{hs:FLP}/ p{hs:FLP}; FRT42 RpS18 p{ubi:GFP} /+; FRT80B/+

RpS18/+; Xrp/+ genotype: p{hs:FLP}/ p{hs:FLP}; FRT42 RpS18 p{ubi:GFP} /+; FRT82B Xrp1<sup>M2-73/+</sup>

RpS3/+ genotype: p{hs:FLP}/ p{hs:FLP}; FRT42/+; FRT82 RpS3 p{arm:LacZ} /+

RpS3/+; Xrp/+ genotype: p{hs:FLP}/ p{hs:FLP}; FRT82 RpS3 p{arm:LacZ} /FRT82B Xrp1<sup>M2-73</sup>

Fig6A-E: w<sup>1-18/+</sup>; FRT82B/+

w<sup>1-18/y</sup> w p{hs:FLP}; FRT82 RpS3 p{arm:LacZ}/+

w<sup>1-18/y</sup> w p{hs:FLP}; RpS17 p{ubi:GFP} FRT80B/+

w<sup>1-18/y</sup> w p{hs:FLP}; FRT82 RpS3 p{arm:LacZ}/FRT82B FRT82B Xrp1<sup>M2-73</sup>

Fig6F,G: p{hs:FLP}/ p{hs:FLP}; M(3)67c p{ubi:GFP} FRT80B/FRT80B

Fig6H,I: p{hs:FLP}/ p{hs:FLP}; M(3)67c p{ubi:GFP} RpS12<sup>G97D</sup> FRT80B/ RpS12<sup>G97D</sup> FRT80B

Fig 6J,K: p{hs:FLP}; FRT42 RpS18<sup>-</sup>/UAS-RpS12-Flag;act>STOP>Gal4, UAS-His-RFP/+

Fig 6L,M: p{hs:FLP}; FRT42 RpS18<sup>-</sup> p{ubi:GFP} /FRT42; FRT82B Xrp<sup>02515/+</sup>

Fig 6N,O: p{hs:FLP}; FRT42 RpS18<sup>-</sup> p{ubi:GFP} /FRT42; RpS12<sup>G97D</sup> FRT80B Xrp<sup>02515/</sup> RpS12<sup>G97D</sup> FRT80B

FigS1A: p{hs:FLP}; FRT42 RpS18 p{arm:lacZ} /FRT42

Fig S1B: p{hs:FLP}; FRT42 RpS18 p{arm:lacZ} /FRT42; FRT82B Xrp1<sup>M2-73/+</sup>

FigS1F: p{hs:FLP}; FRT42 RpS18 p{arm:lacZ} /FRT42; Df(3R)Exel6187/+

Fig S1G: p{hs:FLP}; FRT42 RpS18 p{arm:lacZ} /FRT42; Df(3R)Exel6182/+

Fig S1H: p{hs:FLP}; FRT42 RpS18 p{arm:lacZ} /FRT42; Df(3R)Exel6181/+

FigS1L: p{hs:FLP}; FRT42 RpS18 p{arm:lacZ} /FRT42

Fig S1M: p{hs:FLP}; FRT42 RpS18 p{arm:lacZ} /FRT42; Xrp1<sup>D1/+</sup>

Fig S1N: p{hs:FLP}; FRT42 RpS18 p{arm:lacZ} /FRT42; Xrp1<sup>D1/</sup> FRT82B Xrp1<sup>M2-73</sup>

Fig S1O: p{hs:FLP}; FRT42 RpS18 p{arm:lacZ} /FRT42; Df(3R)Exel6182/ FRT82B Xrp1<sup>M2-73</sup>

Fig S1P: p{hs:FLP}; FRT42 RpS18 p{arm:lacZ} /FRT42; Df(3R)Exel6181/ Df(3R)Exel6182

Fig S2A: FRT82B RpS3 p{arm-LacZ}/FRT82B and FRT82B

Fig S3A: FRT42D

Fig S3B; FRT42D RpS18 p{ubi:GFP}/+; FRT82B/+

FIG S3C: FRT42D RpS18 p{ubi:GFP}/+; FRT82B Xrp1<sup>M2-73/+</sup>

FIG S#D: FRT42D RpS18 p{ubi:GFP}/+; FRT82B Xrp1<sup>M2-73</sup>/Df(3R)Exel6181

FigS4A-K: p{hs:FLP}; FRT42 RpS18 p{ubi:GFP} /+; FRT82B p{arm:lacZ} / FRT82B Xrp1<sup>M2-73</sup>

FigS4L-N: yw; p{arm:LacZ} FRT80B

FigS4O,P: yw; en-GAL4, UAS-GFP

FigS4Q,R: yw; en-GAL4, UAS-GFP;UAS-mycRNAi

FigS4S,T: yw; en-GAL4, UAS-GFP;UAS-Gadd34RNAi

Fig S5B:

w<sup>1-18</sup>/+; FRT82B/+

w<sup>1-18</sup>/y w p{hs:FLP}; FRT82 RpS3 p{arm:LacZ}/+

w<sup>1-18</sup>/y w p{hs:FLP}; RpS17 p{ubi:GFP} FRT80B/+

w<sup>1-18</sup>/y w p{hs:FLP}; FRT82 RpS3 p{arm:LacZ}/FRT82B FRT82B Xrp1<sup>M2-73</sup>

Fig S5C,D: p{hs:FLP}/+; FRT42 RpS18/p{en-Gal4} p{UAS-GFP}; p{UAS-p53.259H}/Xrp<sup>02515</sup>

Fig S5E,F: p{hs:FLP}/+; FRT42 RpS18/p{en-Gal4} p{UAS-GFP}; p{UAS-p53.Ct}/Xrp<sup>02515</sup>

Table S3. 159 Genes significantly altered in Rp<sup>+/-</sup> genotypes both this study and in Kucinski et al (2017). Related to Figure 6.

Supplemental Table 3. Genes differentially regulated in RpS3/+ and RpS17/+ (this study) and in RpS3/+ and RpS3\*/+ (Kucinski et al 2017).

|         |         |         |         |          |         |
|---------|---------|---------|---------|----------|---------|
| AOX1    | Ady43A  | Arc1    | Arc2    | Archease | Bin1    |
| Brd     | CG10005 | CG10189 | CG10445 | CG10559  | CG10638 |
| CG10916 | CG11710 | CG11897 | CG12099 | CG12224  | CG12264 |
| CG12868 | CG13258 | CG14304 | CG14314 | CG14695  | CG14906 |
| CG14907 | CG15784 | CG1582  | CG16787 | CG17327  | CG17574 |
| CG17904 | CG18213 | CG18547 | CG18596 | CG1882   | CG2064  |
| CG2076  | CG2909  | CG3008  | CG30196 | CG3036   | CG31140 |
| CG31549 | CG31875 | CG31918 | CG31955 | CG32549  | CG32625 |
| CG32641 | CG32694 | CG33158 | CG33509 | CG3448   | CG3788  |
| CG42362 | CG42363 | CG42365 | CG42598 | CG43326  | CG43366 |
| CG44194 | CG4858  | CG5535  | CG5664  | CG6171   | CG6330  |
| CG6512  | CG7080  | CG7201  | CG7367  | CG7627   | CG8192  |
| CG8303  | CG8549  | CG9411  | CHKov2  | CIAPIN1  | CRMP    |
| Cda5    | Cul2    | Cyp6a20 | Cyp6d2  | Cyp6d4   | Cyp6g2  |
| Cyp6t3  | Cyp9f2  | Dif     | Dscam3  | Ets21C   | Exn     |
| Gadd45  | Gclc    | Gen5    | Gr64b   | Gr64d    | GstE1   |
| GstE3   | GstE5   | GstE6   | GstE7   | GstE8    | GstT1   |
| HBS1    | Ilp8    | ImpL3   | Ir40a   | Irbp     | Irbp18  |
| IscU    | Jheh1   | Ku80    | Lig4    | MRP      | Men     |
| Mocs1   | NKCC    | Nep2    | Obp99a  | Osi14    | Qtzl    |
| Rack1   | RpA-70  | RpS27A  | RpS9    | Snap25   | SoYb    |
| Sodh-2  | Spn47C  | Swim    | Traf4   | Tsp42Ed  | Ttc19   |
| Ugt86Da | Ugt86Di | Xrp1    | agt     | amd      | baz     |
| dpr6    | drd     | eIF6    | eater   | lama     | lig3    |
| mre11   | mus205  | na      | nsr     | obe      | pgant8  |
| ppk13   | ppk29   | rad50   | rpk     | sra      | unc-13  |
| upd3    | ver     | wus     |         |          |         |

Table S4. Oligonucleotides used in this study.

| Table S4. Oligonucleotides used in the study. Relevant to Key Resources Table |            |     |
|-------------------------------------------------------------------------------|------------|-----|
| For 18S probe: GGTGCTGAAGCTTATGTAGC                                           | Invitrogen |     |
| For 18S probe:<br>TAATACGACTCACTATAGGGAGACAAAGGGCA<br>GGGACG                  | Invitrogen |     |
| For 5.8S probe:<br>GCTTATATGAAACTAAGACATTTTCG                                 | Invitrogen |     |
| For 5.8S probe:<br>TAATACGACTCACTATAGGGTACATAACAGCAT<br>GGACTGC               | Invitrogen |     |
| For tubulin probe:<br>GCCCGTGGCCACTACACCATCGG                                 | Invitrogen |     |
| For tubulin probe:<br>TAATACGACTCACTATAGGGAAGTGAATACGT<br>GGGTAGGG            | Invitrogen |     |
| For actin probe: CCCCATGAGCACGGTATCG                                          | Invitrogen |     |
| For actin probe:<br>TAATACGACTCACTATAGGGAGAAAGAGTAAC<br>CGCGCTCG              | Invitrogen |     |
| Primer, Xrp1-RA, RC, RE, RG forward:<br>TCATCGCGGAACAATAACAGTG                | This paper | N/A |
| Primer, Xrp1-RA, RC, RE, RG reverse:<br>GCAATAGGTTGGGTGGTTCC                  | This paper | N/A |
| Primer, Xrp1-RB forward:<br>ACCGGAGATAAGGAGCAACA                              | This paper | N/A |
| Primer, Xrp1-RB forward:<br>ACCGGAGATAAGGAGCAACA                              | This paper | N/A |
| Primer, Xrp1-RD forward:<br>TAAGAGGTGTTTTTGGTCCGC                             | This paper | N/A |
| Primer, Xrp1-RD reverse:<br>TCCTTCCGTTTTCGCTGTTG                              | This paper | N/A |
| Primer, Xrp1-RF forward:<br>CAACCACGTAACCACCCATCT                             | This paper | N/A |
| Primer, Xrp1-RF reverse:<br>GGGATCTCGAGGATACGCCTG                             | This paper | N/A |
| Primer, $\alpha$ -Tubulin forward:<br>TGTGAATTTTCCTTGTCGCGT                   | This paper | N/A |
| Primer, $\alpha$ -Tubulin reverse:<br>CCAGCAGGCGTTTCCAATC                     | This paper | N/A |
| Primer, Irbp18 forward: TTCGCCATTAAGTCCGCACA                                  | This paper | N/A |
| Primer, Irbp18 reverse: GTTCTCGGCCGATTTCTTG                                   | This paper | N/A |
| Primer, Mre11 forward: GGGCCAGCTAGATGTGACAG                                   | This paper | N/A |
| Primer, Mre11 reverse: GGCAGTATTACGAGAGCCCA                                   | This paper | N/A |
| Primer, IscU forward:<br>TGGCATTAGGTCGTAGTATGCG                               | This paper | N/A |
| Primer, IcsU reverse: GCACTTATCAGCAGTCACGC                                    | This paper | N/A |
| Primer, GstE6 forward: AAAGATCCTCTCAAGCGGGC                                   | This paper | N/A |
| Primer, GstE6 reverse: CTGTCCCTGGAAGAGCACTG                                   | This paper | N/A |
| Primer, CG13220 forward:<br>AGCCCTTGCGGTGAATGTTA                              | This paper | N/A |
| Primer, CG13220 reverse:<br>ACACGTTTCGTCAGGTCCTTC                             | This paper | N/A |
